# Supplementary material for: Rational design of host materials for phosphorescent organic light-emitting diodes by modifying the 1-position of carbazole
Source: Royal Society of Chemistry journal article supplement (doi:10.1039/c5cc02188j), 2015-01-01
Supplement: c5cc02188j1.pdf [file c5cc02188j1.pdf]

## Supporting information

### Rational Design of Host Materials for Phosphorescent Organic Light-Emitting Diodes by Modifying 1- Position of Carbazole

Sung Moo Kim<sup>a</sup>, Sung Yong Byeon<sup>b</sup>, Seok Ho Hwang<sup>b</sup>, Jun Yeob Lee<sup>a\*</sup>

<sup>a</sup>*School of Chemical Engineering, Sungkyunkwan University, Suwo, Gyeonggi-do, 446-740, Korea*

<sup>b</sup>*Department of Polymer Science and Engineering, Dankook University, Yongin-si, Gyeonggi-do, 448-701, Korea*

[leej17@skku.edu](mailto:leej17@skku.edu)

#### Experimental Section

##### General information

Sodium tert-butoxide (NaO(t-bu)), tri-tert-butylphosphine (P(t-bu)<sub>3</sub>), 2-dicyclohexylphosphino-2',4',6'-triisopropylbiphenyl (X-Phos), [1,1-bis-(diphenylphosphino)ferrocene]dichloropalladium(II) (Pd(dppf)Cl<sub>2</sub>), tris(dibenzylideneacetone)dipalladium(0) (Pd<sub>2</sub>(dba)<sub>3</sub>), tetrakis(triphenylphosphine)palladium(0) (Pd(PPh<sub>3</sub>)<sub>4</sub>), palladium(II)acetate (Pd(OAc)<sub>2</sub>), bis(pinacolato)diboron and cesium carbonate (Cs<sub>2</sub>CO<sub>3</sub>) (P&H Tech Co.) were used without further purification. Potassium acetate (CH<sub>3</sub>COOK), sodium hydroxide (NaOH), 1,4-dioxane, toluene, ethanol (EtOH), tetrahydrofuran (THF), dimethylformamide (DMF) (Duksan Sci. Co.) and sodium hydride (NaH) (Aldrich Chem. Co.) were also used as received.

Nuclear magnetic resonance (NMR) spectra were recorded on Varian ( $^1\text{H}$  NMR: 400 MHz), Avance-500 ( $^{13}\text{C}$  NMR: 500 MHz). Ultraviolet-visible (UV-Vis) absorption spectra were recorded on a Shimadzu UV-2501PC and fluorescence spectra were recorded on Hitachi F-7000. Low temperature PL measurement of the synthesized materials were carried out at 77 K using a dilute solution of materials in tetrahydrofuran. Glass transition temperature ( $T_g$ ) and melting point ( $T_m$ ) of synthesized materials were determined using Mettler Toledo DSC 822 under nitrogen atmosphere at a heating rate of  $10^\circ\text{C min}^{-1}$ . The thermogravimetric analysis (TGA) measurement was performed on a TA instrument Q50 at a scanning rate of  $10^\circ\text{C min}^{-1}$  under nitrogen atmosphere. The mass spectra were recorded using a Waters Xevo TQ-S spectrometer in API mode and elemental analysis were recorded using a CE instrument Flash 2000. The HOMO energy levels were measured with a cyclic voltammetry (CV). CV measurement of organic materials was carried out in acetonitrile solution with tetrabutylammonium perchlorate at 0.1 M concentration. Ag was used as the reference electrode and Pt was counter electrode. Ferrocene was used as the standard material for the cyclic voltammetry measurement. The purity of the host materials were measured using high performance liquid chromatography (HPLC) from YL instrument YL-9100.

## Synthesis

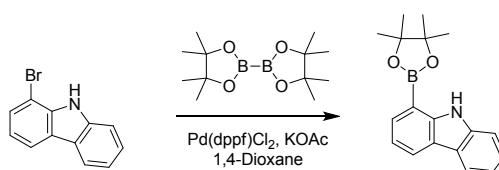

**1-(4,4,5,5-Tetramethyl-1,3,2-dioxaborolan-2-yl)-9H-carbazole** 1-Bromo-9H-carbazole (6.0 g, 24.4 mmol), bis(pinacolato)diboron (9.3 g, 36.6 mmol),  $\text{CH}_3\text{COOK}$  (4.8 g, 48.8 mmol) and  $\text{Pd(dppf)Cl}_2$  (1.0 g, 1.22 mmol) were dissolved in 1,4-dioxane (120 ml) under a nitrogen atmosphere. The reaction mixture was stirred and refluxed for 12 h. The reaction mixture was celite filtered, diluted with ethyl acetate, and washed with water. The organic layer was dried over anhydrous  $\text{MgSO}_4$  and evaporated

in vacuo to give the crude product. The crude product was purified by column chromatography on silica gel using ethyl acetate/n-hexane. The product was obtained as a white powder (4.8 g, Yield 67%).

$^1\text{H}$  NMR (400 MHz, DMSO):  $\delta$  10.30 (s, 1H), 8.24 (d, 1H,  $J$  = 7.6Hz), 8.09 (d, 1H,  $J$  = 8.0Hz), 7.71 (d, 1H,  $J$  = 8.0Hz), 7.67 (d, 1H,  $J$  = 7.6Hz), 7.37 (t, 1H,  $J$  = 7.6Hz), 7.15 (m, 2H), 1.37 (s, 12H). MS (API+)  $m/z$ : 294.1 [(M+H) $^+$ ]

**9-Phenyl-9H,9'H-1,1'-bicarbazole (1)** 1-Bromo-9-phenyl-9H-carbazole (3.2 g, 9.95 mmol), 1-(4,4,5,5-tetramethyl-1,3,2-dioxaborolan-2-yl)-9H-carbazole (3.5 g, 11.9 mmol), NaOH (1.2 g, 29.9 mmol) and  $\text{Pd}(\text{PPh}_3)_4$  (0.57 g, 0.50 mmol) were dissolved in THF (60 ml) and water (30 ml) under a nitrogen atmosphere. The reaction mixture was stirred and refluxed for 12 h. The reaction mixture was diluted with ethyl acetate and washed with water. The organic layer was dried over anhydrous  $\text{MgSO}_4$  and evaporated in vacuo to give the crude product. The crude product was purified by column chromatography on silica gel using ethyl acetate/n-hexane. The product was obtained as a white powder (2.7 g, Yield 67%).

$^1\text{H}$  NMR (400 MHz, DMSO):  $\delta$  10.44 (s, 1H), 8.37 (dd, 1H,  $J$  = 6.4, 2.0Hz), 8.31 (d, 1H,  $J$  = 7.6Hz), 7.92 (d, 1H,  $J$  = 7.6Hz), 7.74 (d, 1H,  $J$  = 7.6Hz), 7.42 (m, 2H), 7.34 (m, 2H), 7.28 (m, 2H), 7.07 (m, 2H), 7.00 (d, 1H,  $J$  = 8.4Hz), 6.91 (t, 1H,  $J$  = 7.6Hz), 6.80 (m, 3H), 6.69 (t, 1H), 6.25 (m, 1H). MS (API+)  $m/z$ : 409.9 [(M+H) $^+$ ]

**9-(4,6-Diphenyl-1,3,5-triazin-2-yl)-9'-phenyl-9H,9'H-1,1'-bicarbazole (1-PCz-1-TCz)** 9-Phenyl-9H,9'H-1,1'-bicarbazole (1.7 g, 4.17 mmol), 2-chloro-4,6-diphenyl-1,3,5-triazine (1.45 g, 5.42 mmol), NaO(t-bu) (0.8 g, 8.34 mmol),  $\text{P}(\text{t-bu})_3$  (50%) (0.34 g, 0.83 mmol) and  $\text{Pd}_2(\text{dba})_3$  (0.19 g, 0.21 mmol) were dissolved in toluene (30 ml) under a nitrogen atmosphere. The reaction mixture was stirred and refluxed for 24 h. The reaction mixture was diluted with DCM and washed with water. The organic layer was dried over anhydrous  $\text{MgSO}_4$  and evaporated in vacuo to give the crude product.

The crude product was purified by column chromatography on silica gel using DCM/n-hexane. The product was obtained as a yellow powder (1.4 g, Yield 52%).

$^1\text{H}$  NMR (400 MHz, DMSO):  $\delta$  8.08 (d, 4H,  $J=7.6\text{Hz}$ ), 8.05 (d, 1H,  $J=8.0\text{Hz}$ ), 7.92 (d, 1H,  $J=7.6\text{Hz}$ ), 7.90 (d, 1H,  $J=7.2\text{Hz}$ ), 7.76 (d, 1H,  $J=8.0\text{Hz}$ ), 7.63 (d, 1H,  $J=7.6\text{Hz}$ ), 7.53 (m, 2H), 7.45 (m, 8H), 7.31 (m, 2H), 7.01 (m, 2H), 6.81 (m, 1H), 6.70 (m, 2H), 6.57 (t, 1H,  $J=7.6\text{Hz}$ ), 6.37 (m, 2H).  $^{13}\text{C}$  NMR (400 MHz,  $\text{CDCl}_3$ ):  $\delta$  170.95, 163.62, 141.30, 140.15, 136.29, 136.13, 135.33, 135.12, 132.11, 128.70, 128.03, 127.89, 127.03, 126.69, 126.49, 126.12, 125.82, 125.66, 125.00, 124.58, 124.10, 122.58, 121.73, 120.57, 120.45, 119.83, 119.69, 119.02, 118.86, 118.62, 112.01, 111.89, 109.70. MS (API+)  $m/z$ : 640.8  $[(\text{M}+\text{H})^+]$

**9'-Phenyl-9H,9'H-1,2'-bicarbazole (2)** 1-Bromo-9H-carbazole (3.0 g, 12.2 mmol), (9-phenyl-9H-carbazol-2-yl)boronic acid (4.2 g, 14.6 mmol), NaOH (1.5 g, 36.6 mmol) and  $\text{Pd}(\text{PPh}_3)_4$  (0.70 g, 0.61 mmol) were dissolved in THF (80 ml) and water (40 ml) under a nitrogen atmosphere. The reaction mixture was stirred and refluxed for 12 h. The reaction mixture was diluted with ethyl acetate and washed with water. The organic layer was dried over anhydrous  $\text{MgSO}_4$  and evaporated in vacuo to give the crude product. The crude product was purified by column chromatography on silica gel using ethyl acetate/n-hexane. The product was obtained as a beige powder (3.3 g, Yield 66%).

$^1\text{H}$  NMR (400 MHz, DMSO):  $\delta$  11.13 (s, 1H), 8.43 (d, 1H,  $J=8.4\text{Hz}$ ), 8.32 (d, 1H,  $J=7.2\text{Hz}$ ), 8.11 (t, 1H,  $J=8.0\text{Hz}$ ), 7.77 (d, 1H,  $J=8.4\text{Hz}$ ), 7.76 (d, 1H,  $J=8.4\text{Hz}$ ), 7.63 (m, 4H), 7.45 (m, 6H), 7.33 (m, 2H), 7.23 (t, 1H,  $J=7.6\text{Hz}$ ), 7.14 (t, 1H,  $J=8.0\text{Hz}$ ). MS (API+)  $m/z$ : 409.9  $[(\text{M}+\text{H})^+]$

**9-(4,6-Diphenyl-1,3,5-triazin-2-yl)-9'-phenyl-9H,9'H-1,2'-bicarbazole (2-PCz-1-TCz)** 9'-Phenyl-9H,9'H-1,2'-bicarbazole (0.8 g, 1.96 mmol), 2-chloro-4,6-diphenyl-1,3,5-triazine (0.68 g, 2.54 mmol), NaO(t-bu) (0.38 g, 3.92 mmol),  $\text{P}(\text{t-bu})_3$  (50%) (0.16 g, 0.08 mmol) and  $\text{Pd}_2(\text{dba})_3$  (0.18 g, 0.20 mmol) were dissolved in toluene (20 ml) under a nitrogen atmosphere. The reaction mixture was stirred and refluxed for 24 h. The reaction mixture was diluted with DCM and washed with water. The

organic layer was dried over anhydrous  $\text{MgSO}_4$  and evaporated in vacuo to give the crude product. The crude product was purified by column chromatography on silica gel using DCM/n-hexane. The product was obtained as yellow powder (0.7 g, Yield 56%).

$^1\text{H}$  NMR (400  $\text{MHz}$ , DMSO):  $\delta$  8.38 (d, 1H,  $J=8.4\text{Hz}$ ), 8.30 (m, 2H), 8.25 (d, 4H,  $J=7.6\text{Hz}$ ), 7.94 (d, 1H,  $J=8.0\text{Hz}$ ), 7.68 (d, 1H,  $J=8.4\text{Hz}$ ), 7.63 (m, 3H), 7.56 (t, 2H), 7.47 (m, 5H), 7.39 (m, 3H), 7.29 (m, 2H), 7.19 (s, 1H), 7.15 (t, 1H,  $J=7.6\text{Hz}$ ), 7.08 (m, 3H).  $^{13}\text{C}$  NMR (500  $\text{MHz}$ ,  $\text{CDCl}_3$ ):  $\delta$  171.93, 165.01, 141.31, 140.84, 139.18, 137.26, 137.00, 135.50, 132.67, 130.79, 129.80, 129.48, 129.28, 128.48, 127.79, 127.40, 127.19, 126.01, 125.68, 123.25, 123.22, 122.88, 122.13, 120.35, 120.27, 120.24, 119.80, 118.99, 113.60, 109.69, 107.85. MS (API+)  $m/z$ : 640.9  $[(\text{M}+\text{H})^+]$

**9'-Phenyl-9H,9'H-1,3'-bicarbazole (3)** 1-Bromo-9H-carbazole (2.0 g, 8.13 mmol), (9-phenyl-9H-carbazol-3-yl)boronic acid (2.8 g, 9.75 mmol), NaOH (1.0 g, 24.4 mmol) and  $\text{Pd}(\text{PPh}_3)_4$  (0.47 g, 0.41 mmol) were dissolved in THF (40 ml) and water (20 ml) under a nitrogen atmosphere. The reaction mixture was stirred and refluxed for 12 h. The reaction mixture was diluted with ethyl acetate and washed with water. The organic layer was dried over anhydrous  $\text{MgSO}_4$  and evaporated in vacuo to give the crude product. The crude product was purified by column chromatography on silica gel using ethyl acetate/n-hexane. The product was obtained as a beige powder (2.2 g, Yield 66%).

$^1\text{H}$  NMR (400  $\text{MHz}$ , DMSO):  $\delta$  11.10 (s, 1H), 8.54 (s, 1H), 8.33 (d, 1H,  $J=7.2\text{Hz}$ ), 8.12 (t, 2H,  $J=9.4\text{Hz}$ ), 7.70 (m, 5H), 7.42 (m, 9H), 7.15 (t, 1H,  $J=7.6\text{Hz}$ ). MS (API+)  $m/z$ : 409.7  $[(\text{M}+\text{H})^+]$

**9-(4,6-Diphenyl-1,3,5-triazin-2-yl)-9'-phenyl-9H,9'H-1,3'-bicarbazole (3-PCz-1-TCz)** The Sodium hydride (0.14 g, 5.88 mmol) added to a stirred solution of 9'-phenyl-9H,9'H-1,3'-bicarbazole (1.6 g, 3.92 mmol) in dry DMF (30 mL) under a nitrogen atmosphere at room temperature. After stirring for 30 min, 2-chloro-4,6-diphenyl-1,3,5-triazine (1.36 g, 5.10 mmol) was added. The reaction mixture was stirred at room temperature for overnight. The reaction mixture was diluted with DCM and washed with water. The organic layer was dried over anhydrous  $\text{MgSO}_4$  and evaporated in vacuo to

give the crude product. The crude product was purified by column chromatography on silica gel using DCM/n-hexane. The product was obtained as a yellow powder (0.8 g, Yield 32%).

$^1\text{H}$  NMR (400 MHz,  $\text{CDCl}_3$ ):  $\delta$  8.38 (d, 1H,  $J=8.4\text{Hz}$ ), 8.29 (m, 3H), 8.19 (dd, 1H,  $J=7.6, 0.8\text{Hz}$ ), 8.16 (dd, 1H,  $J=8.0, 1.2\text{Hz}$ ), 8.05 (d, 1H,  $J=2.0\text{Hz}$ ), 7.70 (dd, 1H,  $J=6.4, 1.2\text{Hz}$ ), 7.64 (d, 1H,  $J=7.6\text{Hz}$ ), 7.57 (t, 1H,  $J=7.6\text{Hz}$ ), 7.53 (m, 1H), 7.45 (m, 3H), 7.38 (m, 7H), 7.23 (m, 4H), 7.19 (m, 2H), 6.94 (m, 1H), 6.76 (d, 1H,  $J=8.0\text{Hz}$ ).  $^{13}\text{C}$  NMR (500 MHz,  $\text{CDCl}_3$ ):  $\delta$  171.68, 164.98, 141.00, 140.64, 139.29, 137.78, 137.48, 135.15, 132.78, 132.53, 130.37, 129.87, 128.83, 128.75, 128.24, 127.46, 127.23, 127.11, 126.85, 125.80, 125.76, 125.30, 123.89, 123.09, 123.05, 122.63, 120.75, 120.37, 119.60, 118.79, 113.01, 109.33, 109.24. MS (API+)  $m/z$ : 640.8  $[(\text{M}+\text{H})^+]$

**9'-Phenyl-9H,9'H-1,4'-bicarbazole (4)** 4-Chloro-9-phenyl-9H-carbazole (4.5 g, 16.2 mmol), 1-(4,4,5,5-tetramethyl-1,3,2-dioxaborolan-2-yl)-9H-carbazole (4.8 g, 16.2 mmol),  $\text{Cs}_2\text{CO}_3$  (10.5 g, 32.4 mmol), X-phos (0.77 g, 1.62 mmol) and  $\text{Pd}(\text{OAc})_2$  (0.18 g, 8.18 mmol) were dissolved in toluene (80 ml), ethanol (30 ml) and water (30 ml) under a nitrogen atmosphere. The reaction mixture was stirred and refluxed for 2 h. The reaction mixture was diluted with ethyl acetate and washed with water. The organic layer was dried over anhydrous  $\text{MgSO}_4$  and evaporated in vacuo to give the crude product. The crude product was purified by column chromatography on silica gel using ethyl acetate/n-hexane. The product was obtained as a beige powder (4.1 g, Yield 62%).

$^1\text{H}$  NMR (400 MHz, DMSO):  $\delta$  10.67 (s, 1H), 8.27 (d, 1H,  $J=7.6\text{Hz}$ ), 8.18 (d, 1H,  $J=7.2\text{Hz}$ ), 7.72 (t, 2H,  $J=7.8\text{Hz}$ ), 7.65 (d, 2H,  $J=7.2\text{Hz}$ ), 7.57 (t, 2H,  $J=7.8\text{Hz}$ ), 7.45 (d, 2H,  $J=8.4\text{Hz}$ ), 7.29 (m, 6H), 7.15 (t, 1H), 6.77 (t, 1H,  $J=7.6\text{Hz}$ ), 6.69 (d, 1H,  $J=7.6\text{Hz}$ ). MS (API+)  $m/z$ : 408.9  $[(\text{M}+\text{H})^+]$

**9-(4,6-Diphenyl-1,3,5-triazin-2-yl)-9'-phenyl-9H,9'H-1,4'-bicarbazole (4-PCz-1-TCz)** 9'-phenyl-9H,9'H-1,4'-bicarbazole (2.0 g, 4.91 mmol), 2-chloro-4,6-diphenyl-1,3,5-triazine (1.7 g, 6.38 mmol),  $\text{NaO}(\text{t-bu})$  (1.42 g, 14.7 mmol),  $\text{P}(\text{t-bu})_3$  (50%) (0.20 g, 0.49 mmol) and  $\text{Pd}_2(\text{dba})_3$  (0.23 g, 0.25 mmol) were dissolved in toluene (30 ml) under a nitrogen atmosphere. The reaction mixture was stirred and

refluxed for 12 h. The reaction mixture was diluted with DCM and washed with water. The organic layer was dried over anhydrous  $\text{MgSO}_4$  and evaporated in vacuo to give the crude product. The crude product was purified by column chromatography on silica gel using DCM/n-hexane. The product was obtained as yellow powder (1.6 g, Yield 81%).

$^1\text{H}$  NMR (400  $\text{MHz}$ ,  $\text{CDCl}_3$ ):  $\delta$  8.29 (d, 1H,  $J=7.6\text{Hz}$ ), 8.23 (d, 2H,  $J=8.4\text{Hz}$ ), 8.20 (m, 3H), 7.95 (d, 1H,  $J=7.6\text{Hz}$ ), 7.89 (d, 1H,  $J=8.0\text{Hz}$ ), 7.62 (m, 2H), 7.45 (m, 10H), 7.20 (m, 6H), 6.92 (m, 1H), 6.80 (m, 2H).  $^{13}\text{C}$  NMR (500  $\text{MHz}$ ,  $\text{CDCl}_3$ ):  $\delta$  171.77, 164.94, 141.71, 141.48, 140.64, 137.49, 137.09, 135.70, 135.07, 132.52, 129.82, 129.69, 128.98, 128.32, 127.64, 127.60, 127.35, 127.15, 125.72, 125.59, 125.42, 123.71, 123.11, 122.57, 120.35, 120.27, 119.73, 112.96, 109.68, 108.28. MS (API+)  $m/z$ : 640.8  $[(\text{M}+\text{H})^+]$

### Device fabrication and measurements

Devices were constructed on a 120 nm thick indium tin oxide (ITO) coated substrate which was cleaned using acetone and hot isopropanol. The cleaned ITO substrate was dried in convection oven and then was coated with a 60 nm thick poly(3,4-ethylenedioxythiophene):poly(styrenesulfonate) (PEDOT:PSS) hole injection layer by spin coating process. The PEDOT:PSS film was baked in ambient air and under nitrogen at 150  $^{\circ}\text{C}$  for 10 min to remove residual solvent. Small molecule hole transport material, 4,4'-cyclohexylidenebis[N,N-bis(4-methylphenyl)aniline] (TAPC) was deposited by vacuum thermal evaporation process at a thickness of 20 nm and a 10 nm thick mCP exciton blocking layer was also formed by thermal evaporation. Emitting layer was deposited by co-doping of synthesized hosts and tris[2-phenylpyridinato- $\text{N},\text{C}^2$ ] iridium(III) ( $\text{Ir}(\text{ppy})_3$ ) at a thickness of 25 nm. Doping concentration of  $\text{Ir}(\text{ppy})_3$  was 3%, which was controlled by managing the evaporation rate of the host and  $\text{Ir}(\text{ppy})_3$ . After the emitting layer deposition, diphenylphosphine oxide-4-(triphenylsilyl)phenyl (TSPO1) was evaporated as an exciton blocking layer at a thickness of 5 nm and

2,2',2''-(1,3,5-benzinetriyl)-tris(1-phenyl-1-H-benzimidazole) (TPBI) was deposited as an electron transport layer at a thickness of 30 nm. LiF (1 nm)/Al (200 nm) double layer was formed on the TPBI layer by thermal evaporation. In the optimization of the 2-PCz-1-TCz devices, a double layer hole transport structure of 4,4',4''-tris(N-carbazolyl)triphenylamine/mCP instead of mCP was selected as the hole transport layer and 1,3,5-tri[(3-pyridyl)-phen-3-yl]benzene was used as the electron transport material. The green devices were encapsulated inside a glove box and all device performances were measured outside the glove box. Electrical and light-emitting performances were characterized using CS 2000 spectroradiometer and Keithley 2400 source measurement unit.

#### **List of figures**

**Figure S1. Cyclic voltammetry curves of host materials**

**Figure S2. DSC curves of the host materials**

**Figure S3. Transient PL spectra of the host materials at 10K**

**Figure S4. Current density-voltage curves of hole only (a) and electron only (b) devices.**

**Figure S5. Current density-voltage-luminance (a) and quantum efficiency-luminance (b) curves of the optimized 2-PCz-1-TCz devices.**

**Figure S6. <sup>1</sup>H-NMR, <sup>13</sup>C-NMR, Mass and HPLC spectra of 1-PCz-1-TCz.**

**Figure S7. <sup>1</sup>H-NMR, <sup>13</sup>C-NMR, Mass and HPLC spectra of 2-PCz-1-TCz.**

**Figure S8. <sup>1</sup>H-NMR, <sup>13</sup>C-NMR, Mass and HPLC spectra of 3-PCz-1-TCz.**

**Figure S9. <sup>1</sup>H-NMR, <sup>13</sup>C-NMR, Mass and HPLC spectra of 4-PCz-1-TCz.**



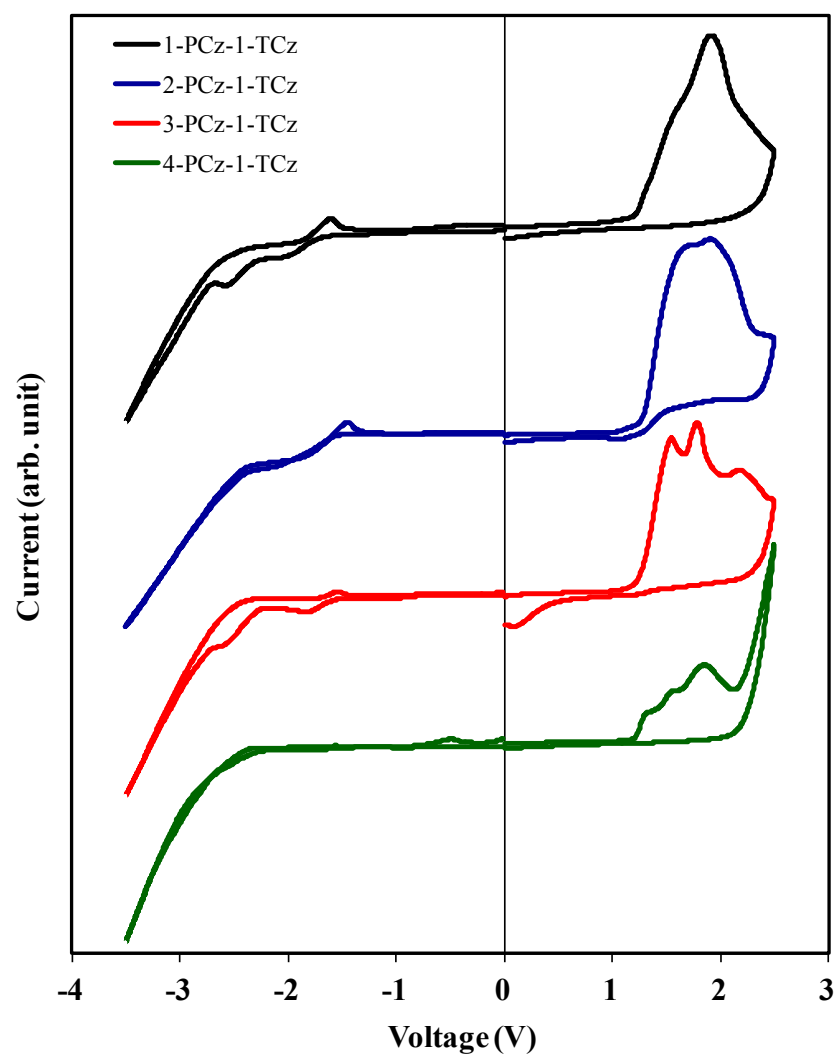

**Figure S1**

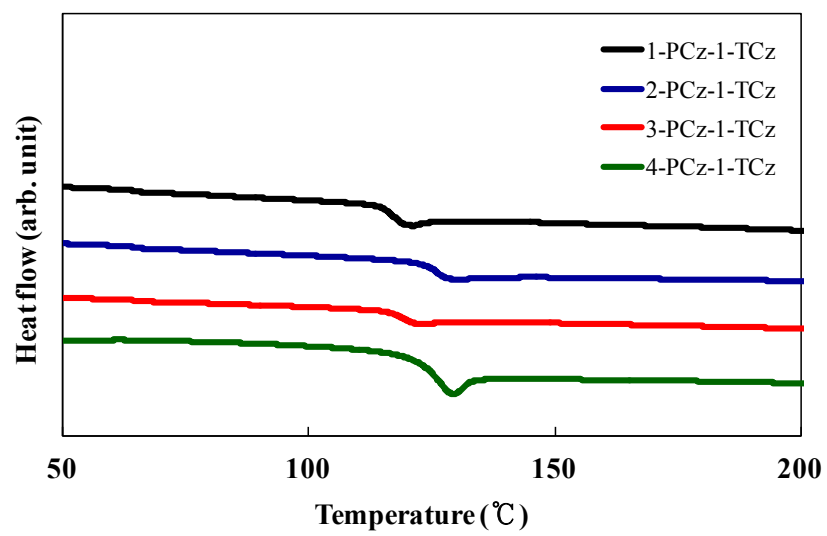

**Figure S2**

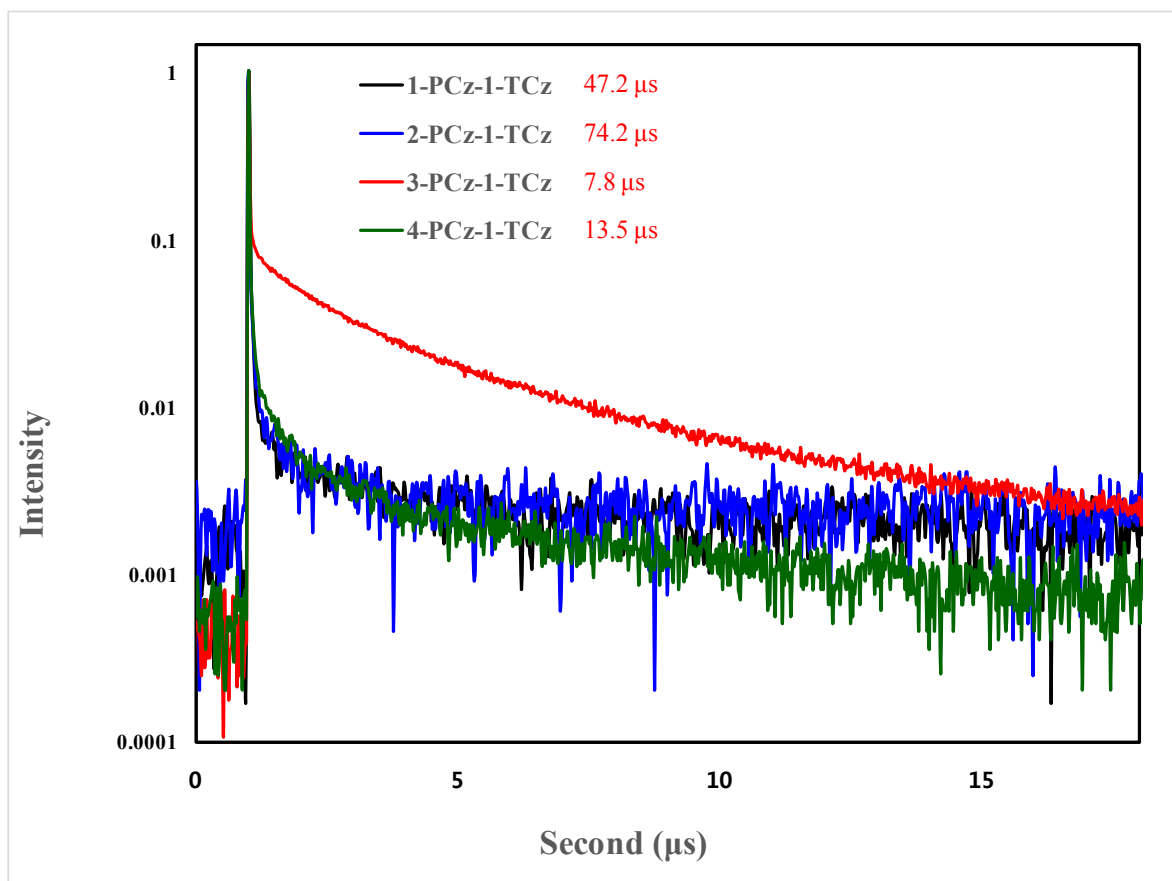

**Figure S3**

(a)

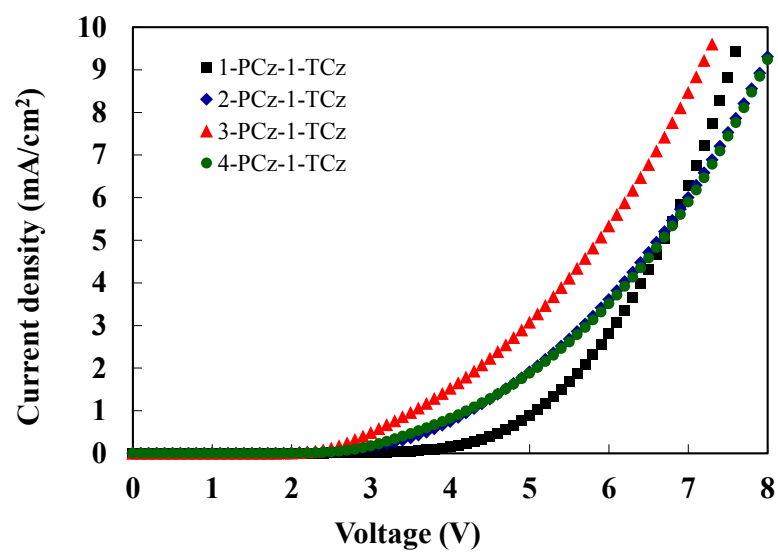

(b)

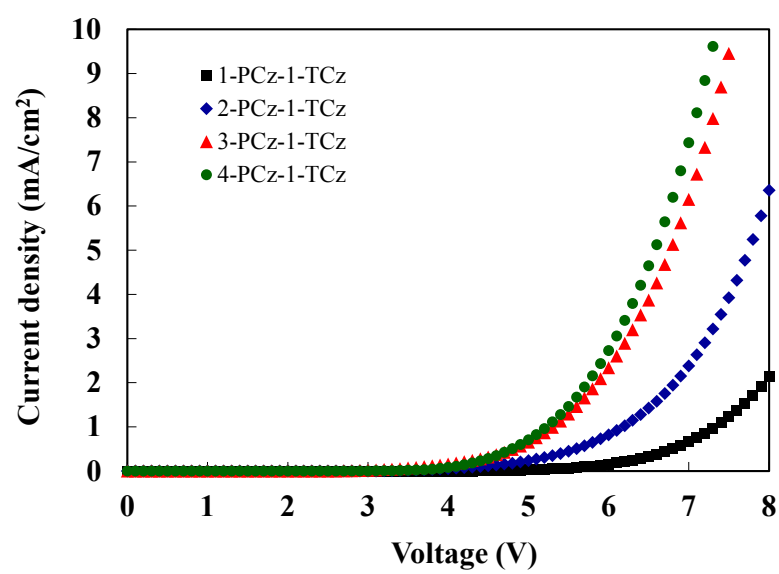

Figure S4

(a)

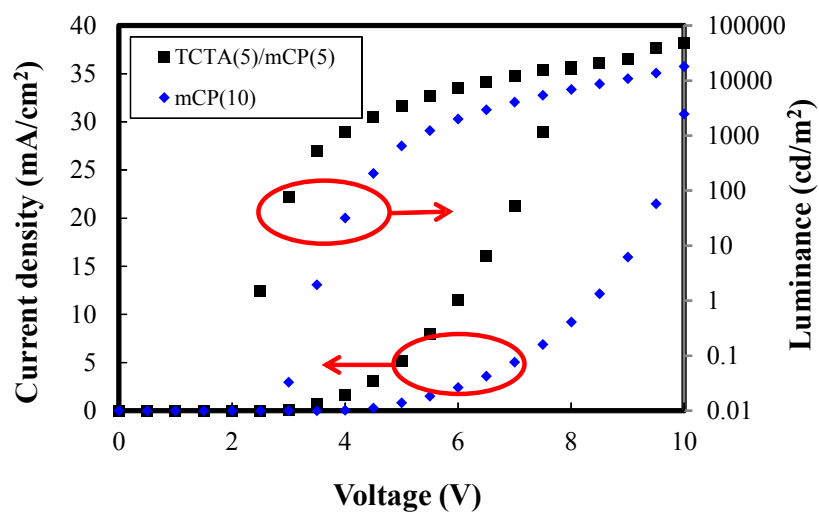

(b)

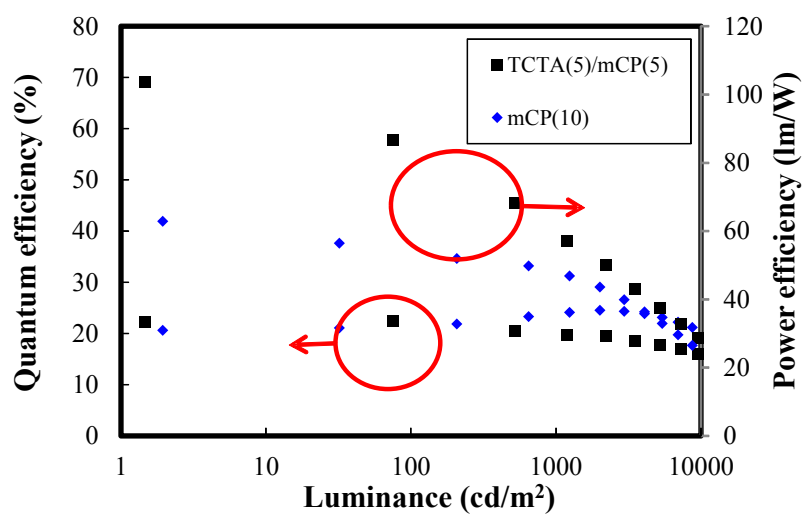

Figure S5

# **<sup>1</sup>H-NMR of 1-PCz-1-TCz**

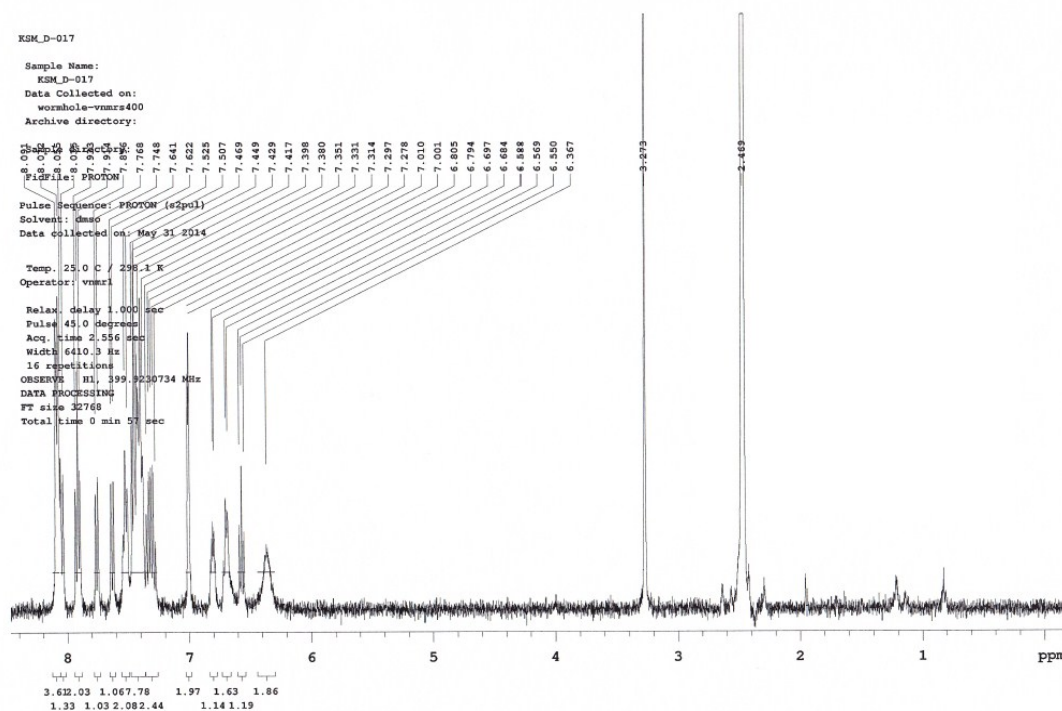

# **<sup>13</sup>C-NMR of 1-PCz-1-TCz**

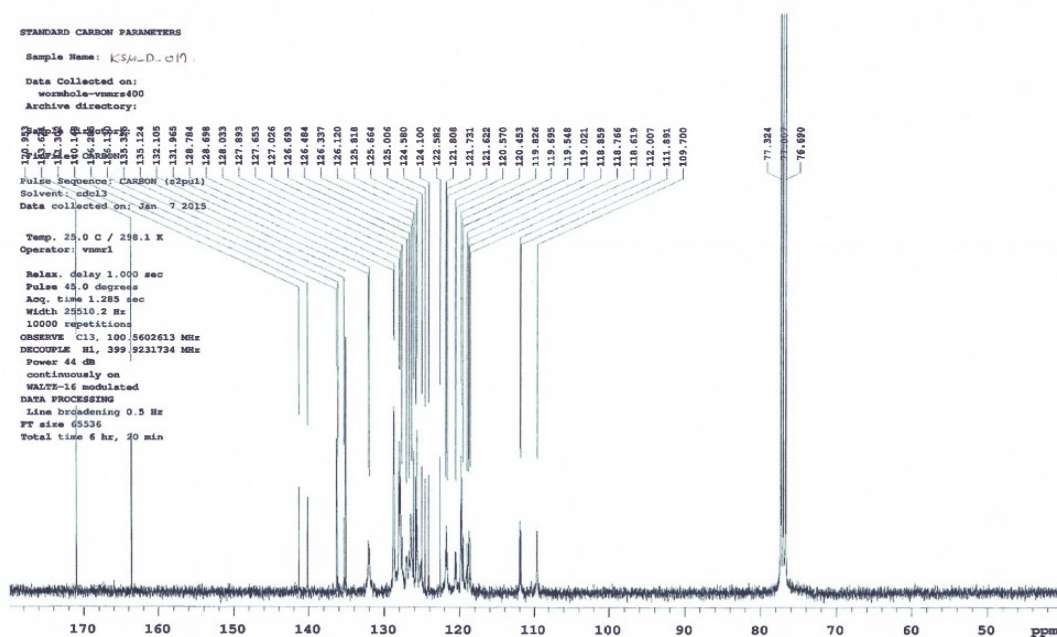

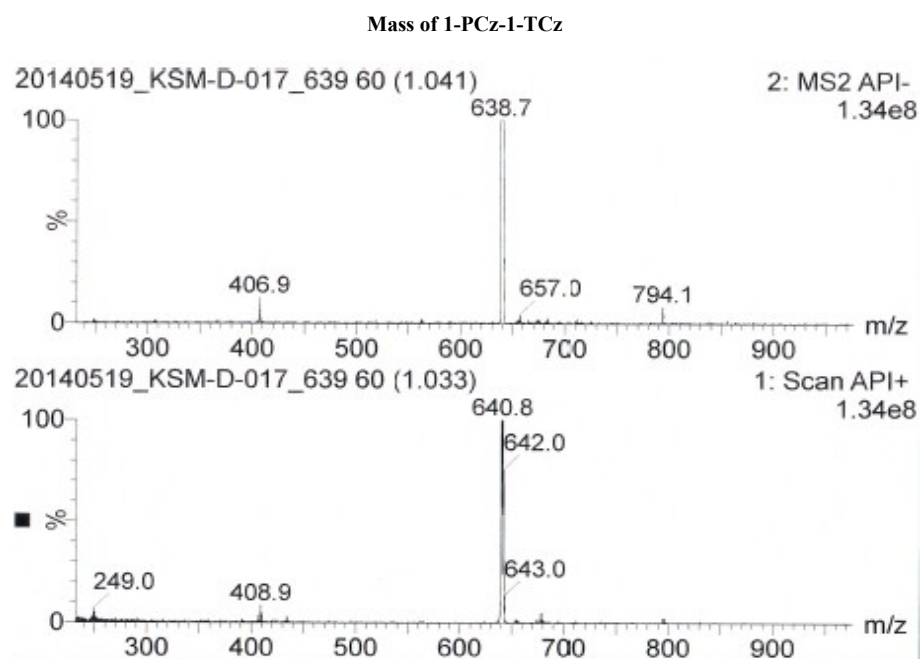

**HPLC spectra of 1-PCz-1-TCz**

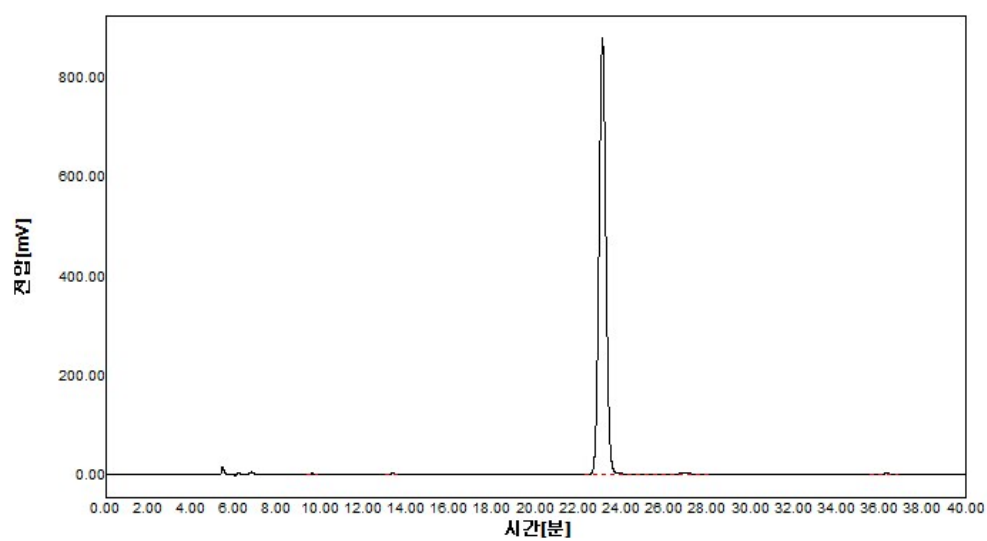

**Figure S6**

# **<sup>1</sup>H-NMR of 2-PCz-1-TCz**

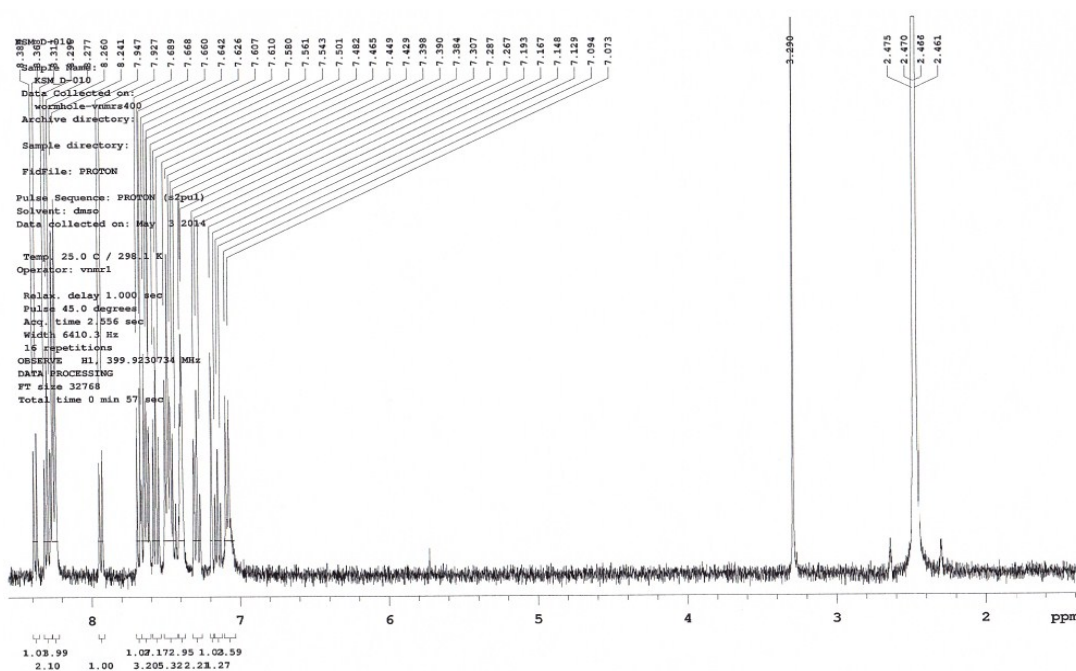

# **<sup>13</sup>C-NMR of 2-PCz-1-TCz**

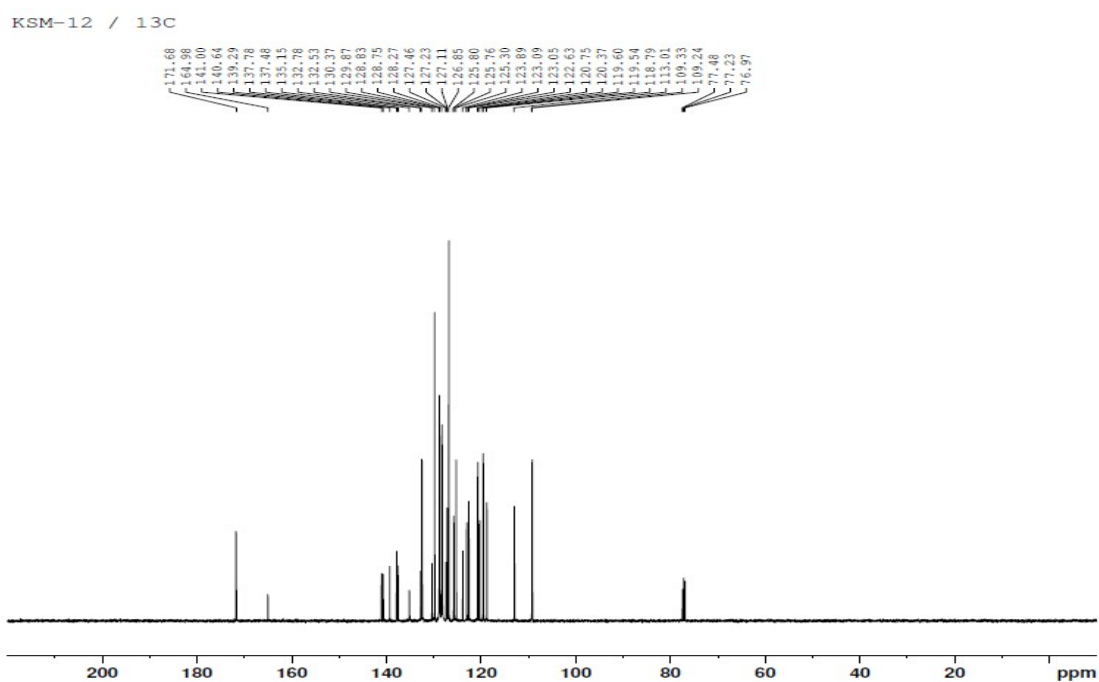



# Mass of 2-PCz-1-TCz

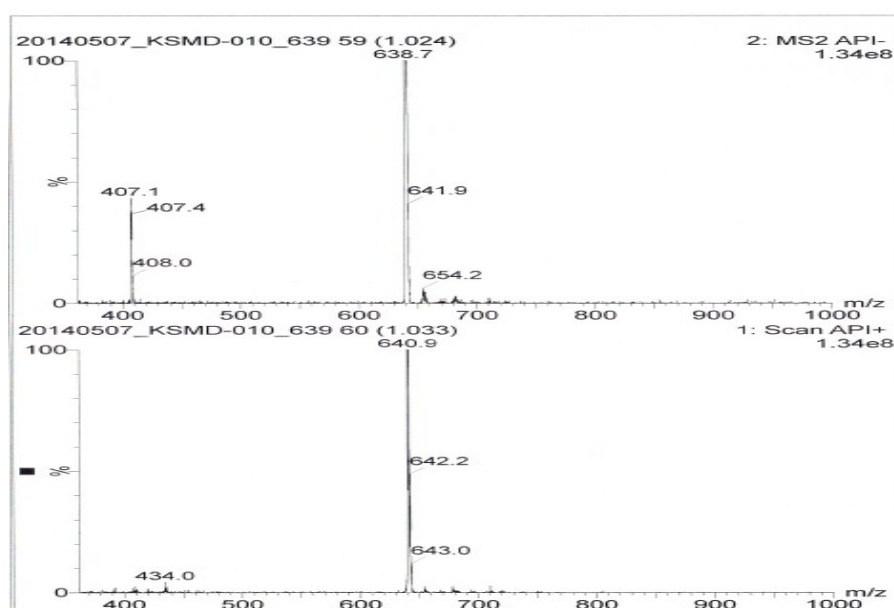

## HPLC spectra of 2-PCz-1-TCz

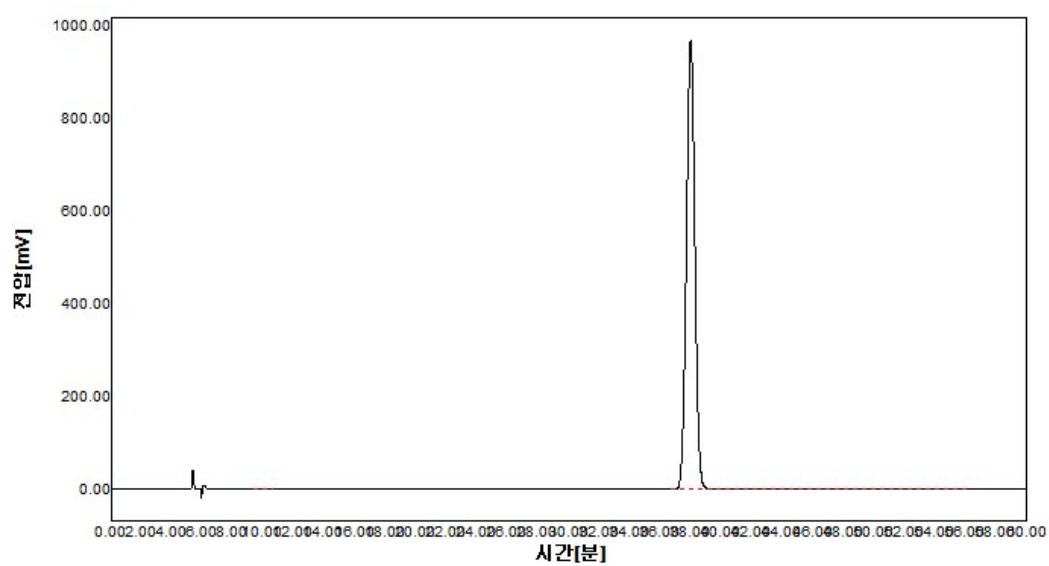

Figure S7

# **<sup>1</sup>H-NMR of 3-PCz-1-TCz**

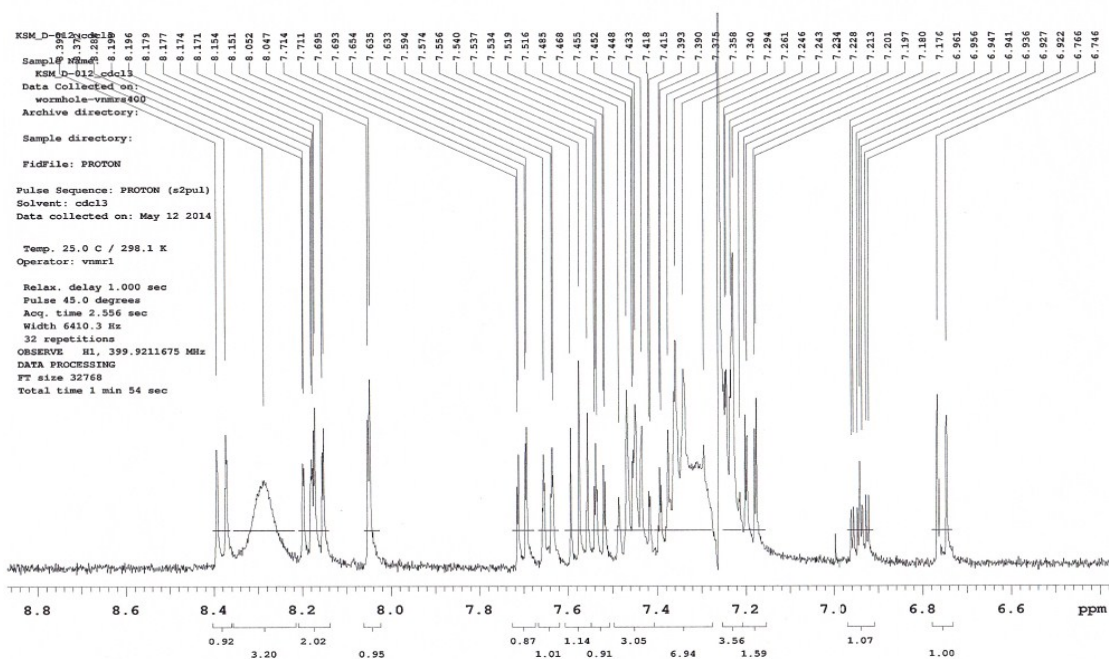

# **<sup>13</sup>C-NMR of 3-PCz-1-TCz**

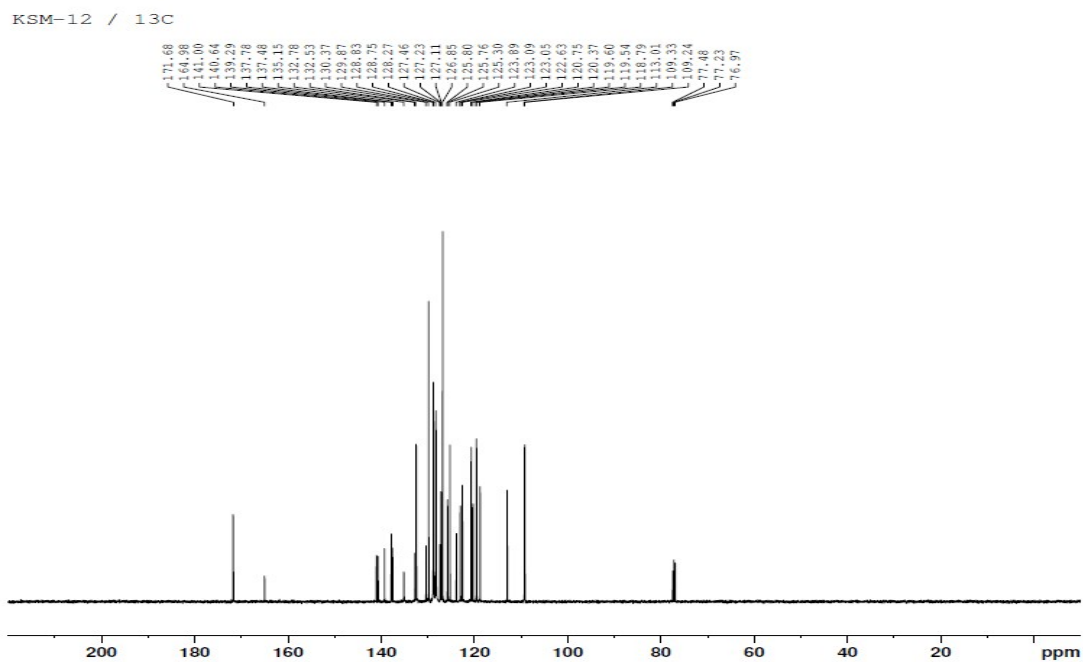

# Mass of 3-PCz-1-TCz

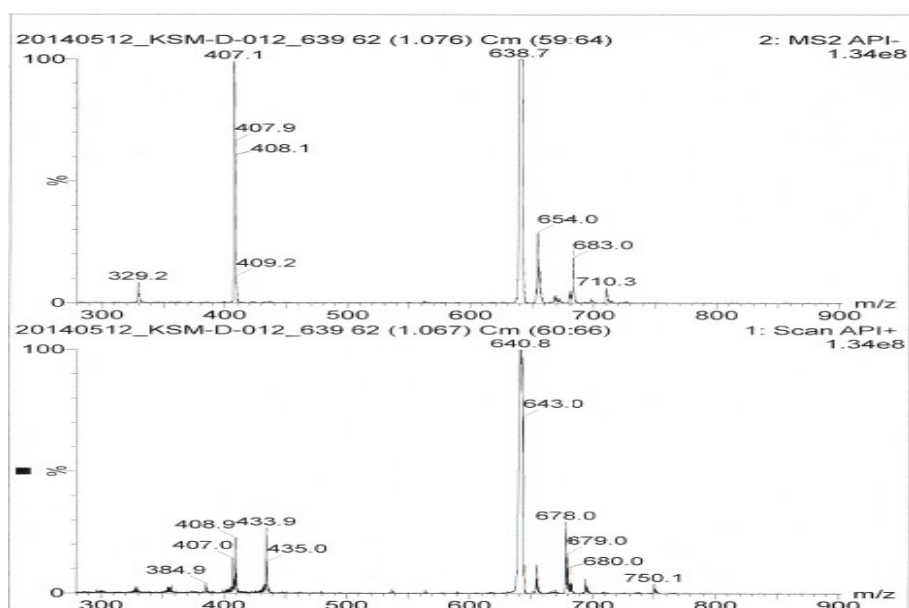

# HPLC spectra of 3-PCz-1-TCz

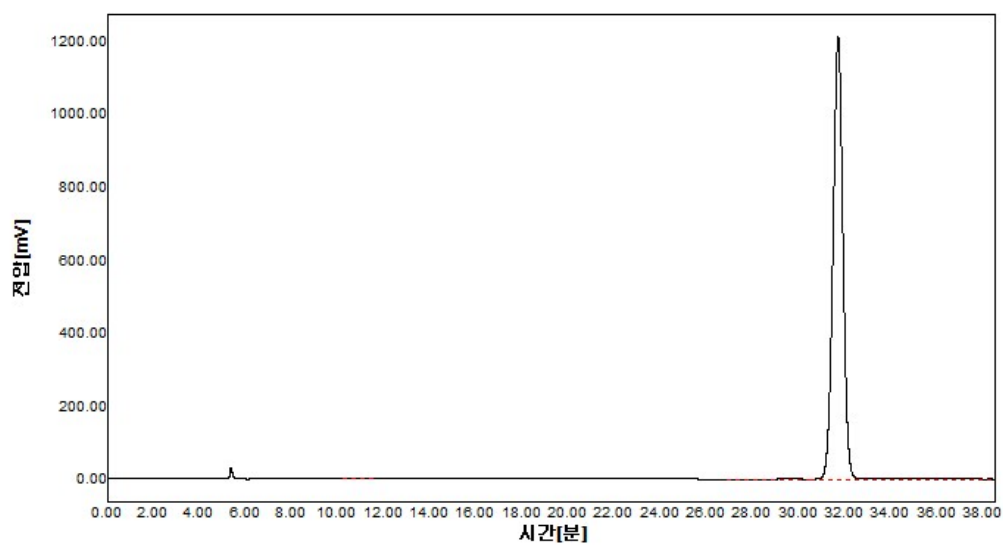

Figure S8

Sample Name:

Data Collected on:  
wormhole-vnmrs400

Archive directory:

Pulse Sequence: PROTON (zgpg30)

Solvent: dcd3

Data collected on: Oct 1 2014

Temp. 25.0 C / 298.1 K

Operator: vnmr1

Relax. delay 1.000 sec

Pulse 45.0 degrees

Acq. time 9.112 sec

Width 6110.3 Hz

32 repetitions

OBSERVE H1, 399.9211704 MHz

DATA PROCESSING

FT size 65536

Total time 3 min 16 sec

1.554

0.000

8

7

6

5

4

3

2

1

ppm

1.10 1.00 1.73 6.09 2.15  
5.04 0.98 9.55 1.28

KSM-20 / 13C

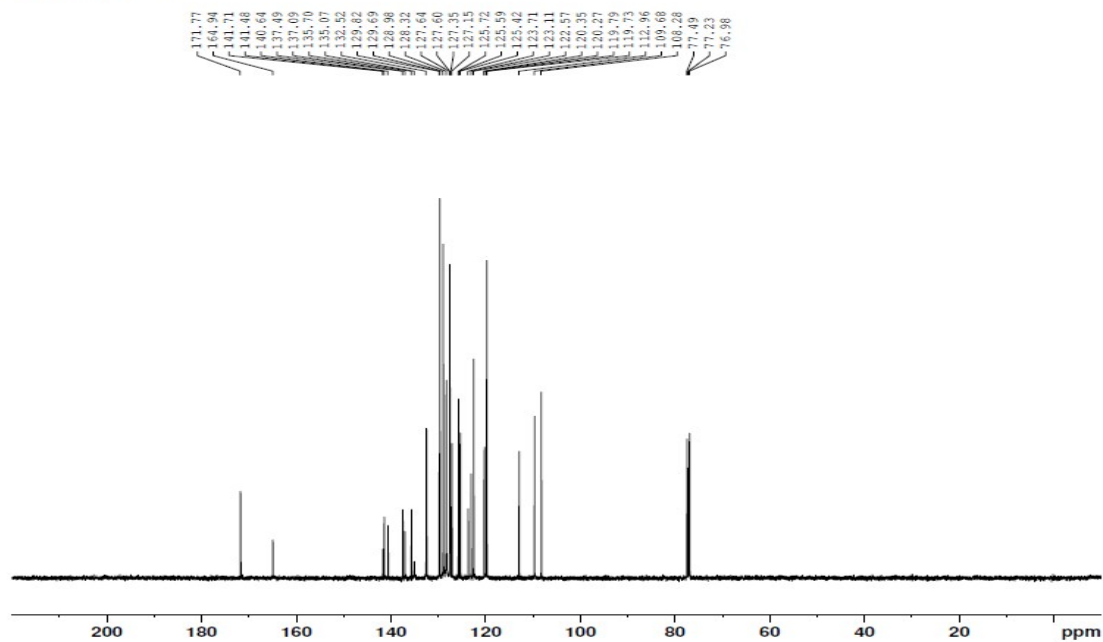

# Mass of 4-PCz-1-TCz

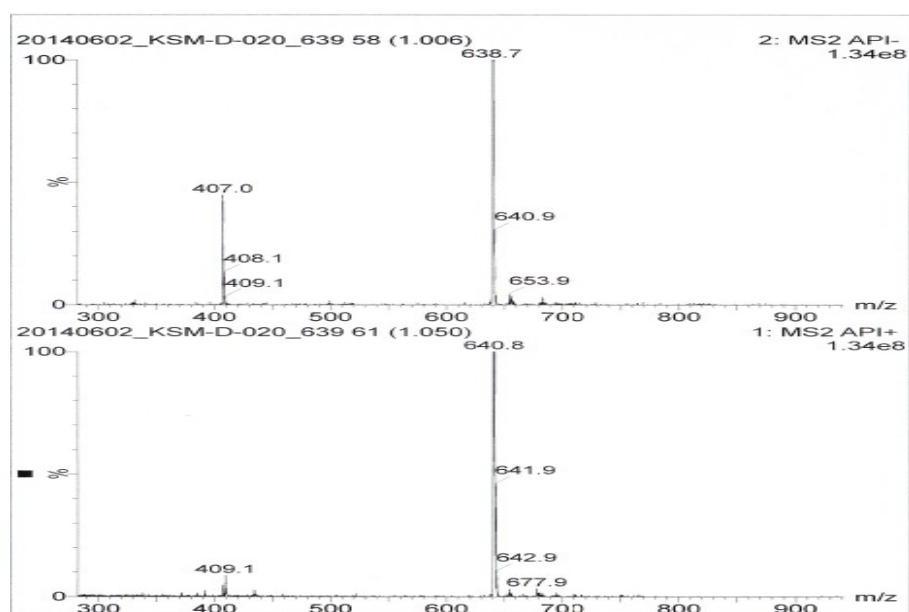

# HPLC spectra of 4-PCz-1-TCz

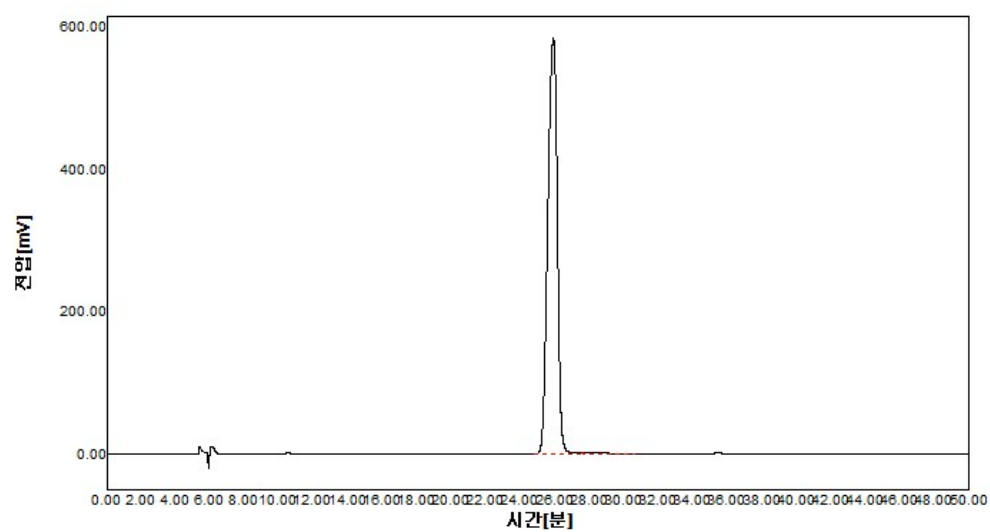

Figure S9
